# 1 **Does no-till agriculture limit crop yields?**

2 Matteo Tanadini and Zia Mehrabi<sup>1</sup>

3 No-till is an agricultural practice widely promoted by governments, development agencies, and  
4 agricultural organisations worldwide. However, the costs and benefits to farmers adopting no-till  
5 are hotly debated<sup>1-4</sup>. Using a meta-analysis of unprecedented study size, Pittelkow *et al.*<sup>5</sup> reported  
6 that adopting no-till results in average yield losses of -5.7%, but that these losses can be limited  
7 with the added implementation of two additional conservation agriculture practices - crop rotation  
8 and crop residue retention, and in dry environments. They claimed that, as a result, resource  
9 limited smallholder farmers, that are unable to implement the whole suite of conservation  
10 agriculture practices are likely to experience yield losses under no-till. In a re-evaluation of their  
11 analysis, we found that they overly biased their results toward showing that no-till negatively  
12 impacts yields, and overlooked the practical significance of their findings. Strikingly, we find that  
13 all of the variables they used in their analysis (e.g. crop residue management, rotation, site aridity  
14 and study duration) are not much better than random for explaining the effect of no-till on crop  
15 yields. Our results suggest that their meta-analysis cannot be used as the basis for evidence-based  
16 decision-making in the agricultural community.

17

18 There is never a perfect analysis, and every analysis involves a large number of decisions, some  
19 of which are often arbitrary. However, our re-evaluation found four major issues with Pittelkow  
20 *et al.*'s meta-analysis, which are fundamental, based on standard statistical theory and best  
21 practice. We show how methodologically accounting for these issues produces results that  
22 strongly challenge the claims and conclusions of Pittelkow *et al.*

---

<sup>1</sup>Liu Institute For Global Issues, Institute for Resources, Environment and Sustainability, & Centre for Sustainable Food Systems, University of British Columbia, Vancouver, British Columbia, Canada, V6T 1Z2

23 First, we found that Pittelkow *et al.*'s estimates were biased to showing no-till leads to a yield  
24 loss. To obtain their -5.7% yield loss figure, they log transformed the ratio of crop yield under no  
25 till and conventional till for each experiment, calculated a weighted mean effect of no-till for all  
26 these experiments and then backtransformed the result using the exponential function. However,  
27 due to Jensen's Inequality, using the exponential function to backtransform a log-ratio is both  
28 biased and inconsistent. In practical terms, this means that the exponentially back-transformed  
29 estimates are underestimated (i.e. too small), even when the sample size is very large. The  
30 magnitude of the bias depends on the variance of the random variable itself, and in many cases is  
31 likely to be negligible. However, for the case of Pittelkow *et al.*, there was massive variation in  
32 the ratio of yields under no-till and till, which forced large bias in their results towards showing a  
33 negative effect of no-till on crop yields. Simply calculating the weighted mean yield ratio in the  
34 untransformed scale produces a value of -2.4%, which is around half of the crop yield loss  
35 reported by Pittelkow *et al.* (-5.7%).

36

37 Second, Pittelkow *et al.* arbitrarily chose to discard observations from their data. They removed  
38 all data points further away than 5 standard deviations from the weighted mean, representing  
39 about 0.5% of the observations, from their analysis. They did not state any reason for how the  
40 threshold of 5 standard deviations was chosen (we are also not aware of any such rule). Because  
41 of the long-tailedness of the data, the removal of these observations had an important effect on the  
42 results. Including the observations that had been arbitrarily removed from the data leads to a yield  
43 ratio of only -1.2%, ~80% less severe than the figure originally reported. Moreover, removing  
44 these observations from the data also did not solve the problem of outliers – it simply created  
45 more of them (Supplementary Information A).

46

47 Third, we found that the statistical significance testing reported by Pittelkow *et al.* was invalid.

48 To calculate the confidence intervals around, and statistical significance of the effect of no-till on

49 crop yields Pittelkow *et al.* used randomization and bootstrapping techniques. A central  
50 assumption of the methods they used is the independence of observations<sup>6</sup>. However, the 5493  
51 experiments in their dataset arose from 609 different studies and so are unlikely to be  
52 independent. Our analysis clearly shows that observations gathered in the same study are more  
53 similar than observations between studies (Supplementary Information A), which in turn  
54 invalidates Pittelkow *et al.*'s statistical tests. In other words, the statistical significance testing  
55 reported in their article should be disregarded. There are established ways to account for this non-  
56 independence (Supplementary Information A). However, due to the large sample size of this data  
57 set, there is also considerable power to detect statistical significant results, even if practical  
58 significance is lacking.

59

60 Finally, we found that Pittelkow *et al.* overlooked the practical significance of their findings. In  
61 their paper, Pittelkow *et al.* acknowledged that there was variability in the effect of no-till on  
62 yields, and in turn acknowledged that there were statistical differences in the effects of no-till  
63 between combinations (or groups) of agricultural practices. However, they did not mention, or  
64 visualise, the huge variability in the effects of no-till within each of these groups, nor determine  
65 how well their analysis was able to explain this variation. This is problematic because  
66 determination of the variation explained by moderators in meta-analysis is a critical component of  
67 interpreting the size and statistical significance of their effects<sup>7</sup>. Whilst ignored by Pittelkow *et*  
68 *al.*, an indication of the practical significance of moderators used in a meta-analysis can be  
69 assessed graphically, or by using a simple meta-analytic equivalent of the  $R^2$  statistic<sup>7-8</sup>.

70

71 In all, forty-three per cent of experiments in Pittelkow *et al.*'s data show the same or higher yields  
72 under no-till. Moreover, the majority of yield ratios (e.g. 95% quantiles), lay between a halving in

73 yields (-51%), to a three quarter increase in yields (+74%) under no-till. As shown graphically in  
74 Figure 1a, this variation makes it very difficult to make any general claims about negative effects  
75 of no-till on crop yield. When we assessed how well the moderators used by Pittelkow *et al.* (i.e.  
76 crop residue management, rotation, site aridity and study duration) helped to explain this large  
77 degree of variation, we found that they all performed extremely poorly. As clearly shown in  
78 Figure 1b, the cumulative explanatory power of all of the moderators Pittelkow *et al.* used in their  
79 analysis (that is, the combined knowledge crop rotation, residue management, site aridity, and  
80 study duration for explaining the effect of no-till on yield) is close to zero, with an  $R^2$  of 0.03.  
81 Thus, whilst Pittelkow *et al.* stated that crop rotation, residue management and aridity were  
82 generally important factors moderating yields under no-till, we found no support for these  
83 conclusions.

84

85 The poor association between the moderators used by Pittelkow *et al.* and the effect of no-till on  
86 crop yield, suggests it makes little sense to make the general claims that rotation, residue  
87 management or site aridity will help increase yields under no-till. It also makes little sense to base  
88 further claims on this finding: such that we might expect yield losses to smallholder farmers, such  
89 as those in sub-Saharan Africa, due to their inability to implement additional conservation  
90 agricultural management practices. However, the applicability of Pittelkow *et al.*'s original  
91 analyses to smallholders in sub-Saharan Africa should be questioned anyway, as observations  
92 from this region only make up ~6% of their data set, with the majority of observations (69%)  
93 coming from N. America, Europe & New Zealand.

94

95

96

MAIN TEXT CONTINUES ON PAGE 6

97

98

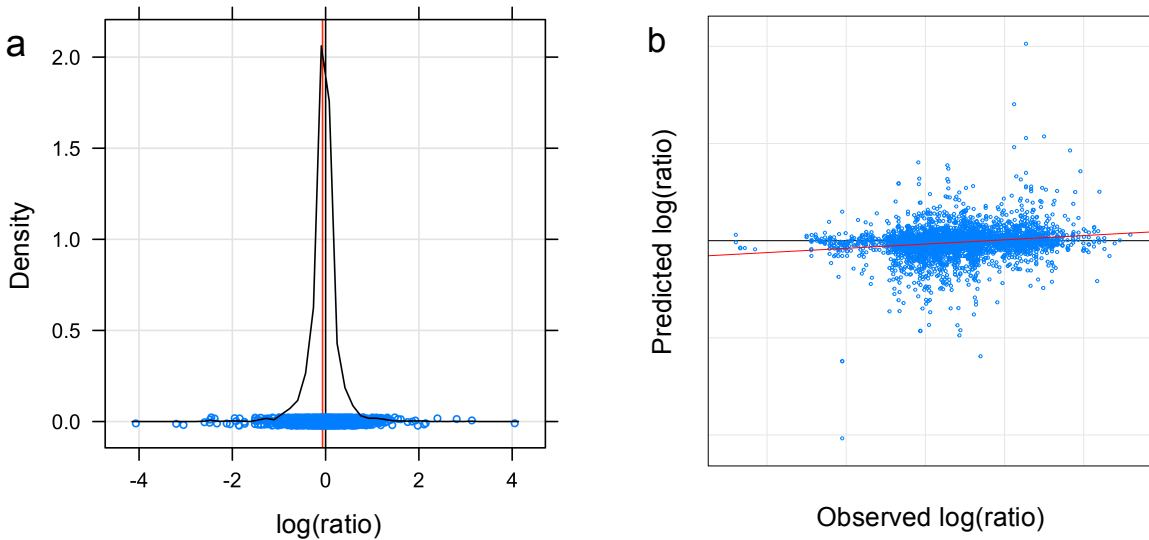

99 Figure 1 (a) This smoothed histogram (also called a density plot) shows the distribution of the log(ratio)  
100 (i.e. the logarithm of the ratio between no-till and till yields). The weighted mean of the data (red line) can  
101 hardly be distinguished from the null hypothesis of no difference between yields under no-till and till (black  
102 line on zero). ( $n$  observations= 5492). (b) This graphical  $R^2$  scatterplot illustrates the relationship between  
103 the predicted and observed values of a linear model including all of the moderators used in the analysis of  
104 Pittelkow *et al.* It shows that the crop rotation, crop residue management, aridity and study duration  
105 moderators, as used by Pittelkow *et al.* as the basis for their analysis, poorly explain differences in the  
106 effect of no-till on yields, with a cumulative explanatory power close to zero ( $n$  observations = 3753; with a  
107 reduction in  $n$  due to the loss of observations from studies which failed to report on moderators, and so  
108 couldn't be used to assess the interactions between moderators that formed the basis of Pittelkow *et al.*'s  
109 main claims in their paper).

110

111

112 In summary, our analysis suggests that Pittelkow *et al.*'s claim that no-till on average reduces  
113 crop yields by 5.7% is incorrect. We found that mean yields under no-till are actually up to 80%  
114 less negative than those they reported (-1.2%). This, in addition to the large variation in  
115 experimental outcomes, and the poor explanatory power of the variables used by Pittelkow *et al.*  
116 in their analysis, strongly challenges the central claims of their paper. Our analysis does not  
117 corroborate their claim that farmers will experience yield deficits under no-till, or that rotation  
118 and residue management will increase yields under no-till. With the large number of possible  
119 factors that could drive differences in yields under no-till, we suggest that much more careful  
120 attention be put towards better variable coding, model building, and model interpretation in future  
121 if general statements on the outcomes of different management practices under no-till are to be  
122 made.

123 There are of course, other, important reasons why farmers may wish to employ crop residue  
124 management and crop rotation alongside no-till in dry environments (e.g. to control pests, soil  
125 erosion and soil moisture retention). Similarly, there are other, potential limiting factors to the  
126 uptake of no-till agriculture by smallholders in some regions of the world (e.g. access to  
127 herbicides, implements)<sup>3-4</sup>. However, we found no support for the claim that yield losses are to be  
128 expected for many of the smallholders currently adopting of no-till practices, or that rotation,  
129 residue management or dry environments generally increase yields under no till. A wealth of  
130 literature has already been published to try and aid biologists in making meta-analyses more  
131 methodologically robust<sup>9-11</sup>. In an effort to try and further help future researchers working with  
132 large datasets and meta-analysis, we detail methods for dealing with the issue we have outlined  
133 here, and many additional others, which did not fit in this response in the Supplementary  
134 Information accompanying this article.

135

136 Methods

137

138 All methods, advice for dealing with other aspects of reproducibility and open science practice  
139 relating to the original Pittelkow *et al.* article, such as data set formatting, code presentation, and  
140 transparency of methods; and other guidance on treatment of large datasets, non-normality, non-  
141 independence, and practical vs. statistical significance, are described in detail in the  
142 Supplementary Information. We note that newer publications<sup>12-13</sup> following the original Pittelkow  
143 *et al.* article do not overcome the problems we have raised here.

144

145 Author contributions

146 MT & ZM designed the study. MT wrote the first draft of the analysis. ZM wrote the first draft of  
147 the paper. Revisions were undertaken by both MT & ZM.

148

149 Competing financial interests

150 The authors declare no competing financial interests.

151 Corresponding author

152 Correspondence to: Zia Mehrabi ([zia.mehrabi@ubc.ca](mailto:zia.mehrabi@ubc.ca)) and Matteo Tanadini  
153 ([matteo.tanadini@gmail.com](mailto:matteo.tanadini@gmail.com)).

154

155

156

157

158

159

160

161

162

163

164   References

165

- 166   1.     Derpsch, R. *et al.* Why do we need to standardize no-tillage research? *Soil and Tillage*  
167         *Research* **137**, 16–22 (2014).
- 168   2.     Powelson, D. S. *et al.* Limited potential of no-till agriculture for climate change mitigation.  
169         *Nature Climate Change* **4**, 678–683 (2014).
- 170   3.     Stevenson, J. R., Serraj, R. & Cassman, K. G. Evaluating conservation agriculture for  
171         small-scale farmers in Sub-Saharan Africa and South Asia. *Agriculture, Ecosystems and*  
172         *Environment* **187**, 1–10 (2014).
- 173   4.     Giller, K. E. *et al.* Beyond conservation agriculture. *Frontiers in Plant Science* **6**, 1–14  
174         (2015).
- 175   5.     Pittelkow, C. M. *et al.* Productivity limits and potentials of the principles of conservation  
176         agriculture. *Nature* **517**, 365–367 (2015).
- 177   6.     Efron, B. & Tibshirani, R.J. An introduction to the bootstrap. CRC press, (1994).
- 178   7.     Lopez-Lopez, J.A. *et al.* Estimation of the predictive power of a model in mixed-effects  
179         meta-regression: A simulation study *British Journal of Mathematical and Statistical*  
180         *Psychology* **67**, 30-48 (2014).
- 181   8.     Aloe, A.M. *et al.* An alternative to  $R^2$  for assessing linear models of effect size. *Research*  
182         *Synthesis Methods* **1**, 272-283. (2010).
- 183   9.     Koricheva, J. & Gurevitch, J. Uses and misuses of meta-analysis in plant ecology. *Journal*  
184         *of Ecology* **102**, 828–844 (2014).
- 185   10.    Nakagawa, S. & Santos, E.S.A. Methodological issues and advances in biological meta-  
186         analysis. *Evolutionary Ecology*, **26**, 1253–1274. (2012)
- 187   11.    Philibert, A., Loyce, C. & Makowski, D Assessment of the quality of meta-analysis in  
188         agronomy. *Agriculture Ecosystems & Environment*, **148**, 72–82. (2012)
- 189   12.    Pittelkow, C. M. *et al.* When does no-till yield more? A global meta-analysis. *Field Crops*  
190         *Research* **183**, 156–168 (2015).
- 191   13.    Lundy, M. E. *et al.* Nitrogen fertilization reduces yield declines following no-till adoption.  
192         *Field Crops Research* **183**, 204–210 (2015).

193

194

195

196

197
